# Supplementary material
Source: Springer Nature journal article supplement (https://www.springermedizin.de/resource/supplementary/12889_2014_6829_MOESM1_ESM.pdf/9499158)
Supplement: MOESM1 [file 9499158]

**Level-4: Self and Family Care**

**Level-3: Care and Support Outside Formal Health Sector**

**Level-2: Mental Health Care Through Primary health Care**

**Level-1: Community Mental Health Services**
